# Supplementary material for: Time in Range in Children with Type 1 Diabetes before and during a Diabetes Camp—A Ceiling Effect?
Source: MDPI journal article supplement (doi:10.3390/children9121951), 2022-12-12
Supplement: s1 [file s1]

**SUPPLEMENT**

**Suppl. Table S1. Selection of participants**

|                                                             |    |
|-------------------------------------------------------------|----|
| Total number of camp participants                           | 38 |
| Number of camp participants without CGM pre-camp and camp   | -6 |
| Number of camp participants with short pre-camp record time | -4 |
| Number of camp participants with short camp record time     | -2 |
| Total number of camp participants included                  | 26 |

**Suppl. Table S2. Glycemic Control before and during camp**

|                                                                                                                                                                                                                                                                                                                                                              |                  | Difference between insulin pen and pump |                                  |                      |
|--------------------------------------------------------------------------------------------------------------------------------------------------------------------------------------------------------------------------------------------------------------------------------------------------------------------------------------------------------------|------------------|-----------------------------------------|----------------------------------|----------------------|
| N                                                                                                                                                                                                                                                                                                                                                            |                  | Insulin pen<br>10                       | Insulin pump<br>16               | p-value<br>.         |
| Time on record (days)                                                                                                                                                                                                                                                                                                                                        | pre-camp<br>camp | .<br>.                                  | .<br>.                           | .<br>.               |
| Time on record (%)                                                                                                                                                                                                                                                                                                                                           | pre-camp<br>camp | 96 [84;100]<br>97 [96;98]               | 94 [80;96]<br>95 [89;97]         | 0.37<br><b>0.045</b> |
| Time in range (TIR) (%)                                                                                                                                                                                                                                                                                                                                      | pre-camp<br>camp | 57.7 ± 21.4<br>67.6 ± 14.2              | 58.5 ± 15.2<br>61.4 ± 10.8       | 0.91<br>0.82         |
| Time below range (TBR) (%)                                                                                                                                                                                                                                                                                                                                   | pre-camp<br>camp | 4.0 ± 3.1<br>5.4 ± 3.1                  | 2.7 ± 1.6<br>5.5 ± 3.1           | 0.16<br>0.92         |
| Time above range (TAR) (%)                                                                                                                                                                                                                                                                                                                                   | pre-camp<br>camp | 38.4 ± 19.6<br>27.0 ± 12.7              | 38.9 ± 15.6<br>27.9 ± 8.9        | 0.94<br>0.83         |
| Daytime TIR (%)                                                                                                                                                                                                                                                                                                                                              | pre-camp<br>camp | 55.7 ± 21.8<br>64.3 ± 15.9              | 55.4 ± 16.8<br>61.4 ± 10.8       | 0.96<br>0.58         |
| Nighttime TIR (%)                                                                                                                                                                                                                                                                                                                                            | pre-camp<br>camp | 60.9 ± 22.0<br>73.0 ± 14.7              | 63.6 ± 14<br>74.8 ± 6.7          | 0.70<br>0.68         |
| Daytime TBR (%)                                                                                                                                                                                                                                                                                                                                              | pre-camp<br>camp | 2.8 [1.1; 6.3]<br>2.4 [2.1; 5.7]        | 2.1 [0.8; 2.6]<br>4.1 [2.7; 6.1] | 0.34<br>0.17         |
| Nighttime TBR (%)                                                                                                                                                                                                                                                                                                                                            | pre-camp<br>camp | 4.7 ± 4.1<br>8.7 ± 5.5                  | 3.4 ± 2.5<br>6.9 ± 4.7           | 0.33<br>0.40         |
| Daytime TAR (%)                                                                                                                                                                                                                                                                                                                                              | pre-camp<br>camp | 40.7 ± 20.2<br>32.4 ± 15.6              | 42.4 ± 18.0<br>34.0 ± 11.7       | 0.83<br>0.76         |
| Nighttime TAR (%)                                                                                                                                                                                                                                                                                                                                            | pre-camp<br>camp | 34.4 ± 20.0<br>18.3 ± 10.9              | 33.1 ± 13.4<br>18.3 ± 7.9        | 0.84<br>0.99         |
| Scans per day with isCGM                                                                                                                                                                                                                                                                                                                                     | pre-camp<br>camp | 13.1 ± 5.7<br>16.7 ± 5.3                | 13.1 ± 3.7<br>19.7 ± 4.0         | 0.98<br>0.26         |
| Difference TIR pre-camp to camp (%)                                                                                                                                                                                                                                                                                                                          | (%)              | 10.0 ± 9.3                              | 8.2 ± 16.7                       | 0.75                 |
| Difference TBR pre-camp to camp (%)                                                                                                                                                                                                                                                                                                                          | (%)              | 1.4 ± 1.4                               | 2.8 ± 2.8                        | 0.14                 |
| Difference TAR pre-camp to camp (%)                                                                                                                                                                                                                                                                                                                          | (%)              | -11.4 ± 9.3                             | -11.0 ± 17.8                     | 0.95                 |
| Difference TDD pre-camp to camp (%)                                                                                                                                                                                                                                                                                                                          | (%)              | -17.3 ± 13.5                            | -19.0 ± 9.6                      | 0.71                 |
| In case of normal distribution, data is given as mean ± standard deviation and t-test was used for comparison between groups and paired t-test for comparison pre-camp and camp. For quantitative data without normal distribution Mann-Whitney-U-Test and Wilcoxon Ranks Test were used for comparison and data are given as median [25th;75th percentile]. |                  |                                         |                                  |                      |
